# Supplementary material
Source: ML conference proceedings conference paper supplement (https://proceedings.neurips.cc/paper_files/paper/2022/hash/240cc9ac4789351653d13cfcba4ee85c-Abstract.html)
Supplement: Supplementary file 1 [file 240cc9ac4789351653d13cfcba4ee85c-Supplemental-Conference.zip]

Archive with 12 entries (12 files):
- heat-sip.ipynb
- heat-sip.pdf
- README.txt
- source/exp.py
- source/fluid_v0_net_swirl.py
- source/heat_net2_fno.py
- source/heat_net2_infinite.py
- source/poisson_net2.py
- source/poisson_net2_fno.py
- source/sin_lin_net.py
- source/trajectories_2d.py
- Appendix.pdf
