# Supplementary material
Source: ML conference proceedings conference paper supplement (https://proceedings.neurips.cc/paper_files/paper/2022/hash/240cc9ac4789351653d13cfcba4ee85c-Abstract.html)
Supplement: Supplementary file 1 [file 240cc9ac4789351653d13cfcba4ee85c-Supplemental-Conference.zip › README.txt]

The supplemental material includes

* The training scripts we used in our experiments as Python files in source/
* A Jupyter notebook demonstrating SIP training for the heat equation. Requires PyTorch and PhiFlow to run.
* A PDF version of that notebook including results and figures
